# Supplementary material for: A Uniform Computational Approach Improved on Existing Pipelines to Reveal Microbiome Biomarkers of Nonresponse to Immune Checkpoint Inhibitors
Source: Oxford University Press journal article supplement (doi:10.1158/1078-0432.ccr-20-4834), 2021-02-16
Supplement: 10780432ccr204834-sup-257224_2_supp_6901642_qz2p1x.xls [file 10780432ccr204834-sup-257224_2_supp_6901642_qz2p1x.xls]

## Sheet: Table S3
								% Positive Rate (across R and NR samples)
	Microbiome Feature	Fixed Effects Hedge's G SMD	Rand Effects Hedge's G SMD	Fixed Effects p value	Random Effects p value	I2	Tau	Chaput	Frankel	Gopalakrishnan	Matson	Routy NSCLC	Routy RCC
	Acidaminococcus_fermentans-1	-0.0343	-0.0343	0.7744	0.7744	0	0	3.84615	5.12821	0	2.38095	6.89655	15.1515
	Acidaminococcus_intestinalis:Acidaminococcus_intestini-2	-0.0296	-0.0296	0.8048	0.8048	0	0	3.84615	0	30.2326	21.4286	0	0
	Acidaminococcus_intestini-3	0.1433	0.1433	0.2313	0.2313	0	0	0	2.5641	0	0	17.2414	16.6667
	Acidaminococcus_unclassified-4	-0.0011	-0.0011	0.9929	0.9929	0	0	0	41.0256	0	0	26.4368	13.6364
	Actinomyces_graevenitzii-5	-0.233	-0.23	0.0541	0.1983	0.511	0.0955	0	46.1538	4.65116	4.7619	16.092	6.06061
	Actinomyces_odontolyticus-6	-0.0551	-0.0656	0.6467	0.6247	0.171	0.0185	7.69231	74.359	6.97674	33.3333	6.89655	3.0303
	Actinomyces_oris-7	-0.064	-0.064	0.5927	0.5927	0	0	0	28.2051	0	0	0	0
	Actinomyces_turicensis-8	0.0358	0.0358	0.7646	0.7646	0	0	0	7.69231	0	2.38095	0	6.06061
	Actinomyces_viscosus-9	-0.1157	-0.1157	0.3342	0.3342	0	0	3.84615	43.5897	0	0	1.14943	0
	Adlercreutzia_equolifaciens:Asaccharobacter_celatus-11	-0.1167	-0.1167	0.3302	0.3302	0	0	34.6154	0	20.9302	66.6667	0	0
	Adlercreutzia_equolifaciens-10	0.0566	0.0566	0.6363	0.6363	0	0	46.1538	79.4872	0	0	39.0805	66.6667
	Aggregatibacter_segnis-12	0.0019	0.0019	0.9871	0.9871	0	0	0	0	4.65116	0	1.14943	1.51515
	Akkermansia_muciniphila-13	0.1689	0.1689	0.1597	0.1597	0	0	3.84615	94.8718	60.4651	92.8571	56.3218	68.1818
	Alistipes_finegoldii:Alistipes_senegalensis-15	-0.0655	-0.0655	0.584	0.584	0	0	0	0	67.4419	61.9048	0	0
	Alistipes_finegoldii-14	-0.1223	-0.1204	0.3088	0.3495	0.108	0.0109	53.8462	84.6154	76.7442	71.4286	68.9655	81.8182
	Alistipes_indistinctus-16	0.1172	0.1172	0.3278	0.3278	0	0	34.6154	53.8462	27.907	19.0476	58.6207	65.1515
	Alistipes_massiliensis:Alistipes_senegalensis-18	-0.0256	-0.0256	0.8304	0.8304	0	0	26.9231	0	0	0	0	0
	Alistipes_massiliensis-17	-0.0488	-0.0488	0.6835	0.6835	0	0	57.6923	0	6.97674	7.14286	0	0
	Alistipes_onderdonkii-19	-0.1532	-0.1532	0.2008	0.2008	0	0	73.0769	92.3077	62.7907	83.3333	67.8161	78.7879
	Alistipes_putredinis-20	0.1619	0.1619	0.1765	0.1765	0	0	0	100	0	0	70.1149	83.3333
	Alistipes_senegalensis-21	-0.1085	-0.1085	0.3658	0.3658	0	0	57.6923	58.9744	34.8837	47.619	55.1724	75.7576
	Alistipes_shahii-22	0.0919	0.0919	0.4438	0.4438	0	0	53.8462	92.3077	55.814	69.0476	63.2184	87.8788
	Alistipes_sp_AP11-23	0.0657	0.0657	0.5825	0.5825	0	0	0	23.0769	0	0	22.9885	30.303
	Alistipes_unclassified-24	-0.0461	-0.0461	0.7005	0.7005	0	0	0	23.0769	0	0	36.7816	27.2727
	Alloscardovia_omnicolens-25	-0.1561	-0.1561	0.1925	0.1925	0	0	0	20.5128	0	4.7619	5.74713	3.0303
	Anaerococcus_vaginalis-26	0.0229	0.0236	0.8489	0.8695	0.267	0.0329	0	25.641	2.32558	7.14286	0	0
	Anaerofustis_stercorihominis-27	-0.0243	-0.0243	0.8391	0.8391	0	0	0	58.9744	4.65116	28.5714	1.14943	0
	Anaerostipes_butyraticus-28	-0.0138	-0.0138	0.9079	0.9079	0	0	96.1538	0	6.97674	28.5714	0	0
	Anaerostipes_caccae-29	-0.0477	-0.0477	0.6908	0.6908	0	0	3.84615	23.0769	25.5814	26.1905	5.74713	0
	Anaerostipes_hadrus-30	0.1969	0.1969	0.1007	0.1007	0	0	0	87.1795	0	0	43.6782	69.697
	Anaerostipes_unclassified-31	-0.1255	-0.1255	0.2946	0.2946	0	0	0	20.5128	0	0	20.6897	1.51515
	Anaerotruncus_colihominis-32	-0.1519	-0.1519	0.2056	0.2056	0	0	38.4615	89.7436	53.4884	66.6667	59.7701	48.4848
	Anaerotruncus_unclassified-33	-0.0596	-0.0596	0.619	0.619	0	0	0	82.0513	0	0	58.6207	66.6667
	Atopobium_parvulum-34	-0.1361	-0.1101	0.2586	0.4878	0.389	0.0576	0	33.3333	2.32558	16.6667	18.3908	6.06061
	Bacteroidales_bacterium_ph8-35	0.1662	0.1662	0.1654	0.1654	0	0	0	51.2821	0	0	67.8161	83.3333
	Bacteroides_acidifaciens:Bacteroides_ovatus-37	0.0011	0.0011	0.9926	0.9926	0	0	0	0	23.2558	9.52381	0	0
	Bacteroides_acidifaciens:Bacteroides_uniformis-38	-0.0352	-0.0352	0.7681	0.7681	0	0	0	0	25.5814	9.52381	0	0
	Bacteroides_acidifaciens:Bacteroides_xylanisolvens-39	-0.0379	-0.0379	0.7514	0.7514	0	0	7.69231	0	32.5581	42.8571	0	0
	Bacteroides_acidifaciens-36	-0.0619	-0.0619	0.6049	0.6049	0	0	3.84615	0	86.0465	83.3333	0	0
	Bacteroides_barnesiae-40	0.0619	0.0619	0.6056	0.6056	0	0	3.84615	2.5641	0	0	1.14943	0
	Bacteroides_caccae:Bacteroides_faecis:Bacteroides_thetaiotaomicron-42	-0.0112	-0.0112	0.9252	0.9252	0	0	11.5385	0	0	0	0	0
	Bacteroides_caccae-41	0.0787	0.0684	0.5133	0.6626	0.375	0.0543	42.3077	100	69.7674	57.1429	62.069	68.1818
	Bacteroides_cellulosilyticus:Bacteroides_intestinalis-44	-0.1079	-0.1079	0.3673	0.3673	0	0	50	0	6.97674	7.14286	0	0
	Bacteroides_cellulosilyticus-43	-0.0589	-0.0589	0.622	0.622	0	0	42.3077	87.1795	44.186	57.1429	58.6207	69.697
	Bacteroides_clarus-45	-0.0636	-0.0636	0.5951	0.5951	0	0	23.0769	15.3846	6.97674	4.7619	27.5862	50
	Bacteroides_coprocola-46	-0.2786	-0.2786	0.0207	0.0207	0	0	7.69231	15.3846	4.65116	2.38095	14.9425	22.7273
	Bacteroides_coprophilus-47	-0.1063	-0.1063	0.3754	0.3754	0	0	3.84615	17.9487	6.97674	0	6.89655	13.6364
	Bacteroides_dorei:Bacteroides_vulgatus-49	-0.0111	-0.0111	0.9263	0.9263	0	0	19.2308	0	20.9302	42.8571	0	0
	Bacteroides_dorei-48	-0.022	-0.022	0.854	0.854	0	0	73.0769	92.3077	88.3721	88.0952	72.4138	84.8485
	Bacteroides_eggerthii-50	-0.0612	-0.0725	0.6106	0.6042	0.229	0.0268	23.0769	30.7692	16.2791	14.2857	28.7356	34.8485
	Bacteroides_faecichinchillae:Bacteroides_faecis:Bacteroides_thetaiotaomicro-51	-0.0942	-0.0942	0.4314	0.4314	0	0	0	0	76.7442	78.5714	0	0
	Bacteroides_faecis:Bacteroides_thetaiotaomicron-53	-0.0026	-0.0026	0.9827	0.9827	0	0	50	0	0	0	0	0
	Bacteroides_faecis-52	0.0217	0.0365	0.857	0.8199	0.403	0.061	11.5385	71.7949	0	0	20.6897	40.9091
	Bacteroides_finegoldii:Bacteroides_xylanisolvens-55	0.0201	0.0201	0.8666	0.8666	0	0	0	0	18.6047	14.2857	0	0
	Bacteroides_finegoldii-54	0.0048	0.0048	0.968	0.968	0	0	26.9231	74.359	60.4651	54.7619	29.8851	37.8788
	Bacteroides_fluxus-56	0.1368	0.1368	0.2538	0.2538	0	0	3.84615	0	9.30233	19.0476	1.14943	1.51515
	Bacteroides_fragilis-57	-0.2687	-0.2748	0.026	0.0568	0.265	0.0328	53.8462	74.359	60.4651	45.2381	65.5172	51.5152
	Bacteroides_intestinalis-58	-0.0922	-0.0922	0.4419	0.4419	0	0	7.69231	84.6154	20.9302	33.3333	18.3908	25.7576
	Bacteroides_massiliensis-59	-0.0677	-0.096	0.5743	0.5827	0.492	0.0878	38.4615	97.4359	27.907	35.7143	33.3333	39.3939
	Bacteroides_nordii-60	-0.0622	-0.0646	0.6043	0.6041	0.06	0.0058	23.0769	46.1538	23.2558	30.9524	31.0345	39.3939
	Bacteroides_oleiciplenus:Bacteroides_stercorirosoris-62	-0.0175	-0.0175	0.8833	0.8833	0	0	0	0	20.9302	14.2857	0	0
	Bacteroides_oleiciplenus-61	-0.1785	-0.1785	0.1365	0.1365	0	0	0	7.69231	0	0	2.29885	6.06061
	Bacteroides_ovatus:Bacteroides_xylanisolvens-64	0.054	0.054	0.6519	0.6519	0	0	0	0	41.8605	71.4286	0	0
	Bacteroides_ovatus-63	-0.0062	-0.0139	0.959	0.9269	0.337	0.0458	73.0769	100	88.3721	92.8571	80.4598	90.9091
	Bacteroides_plebeius-65	-0.0186	-0.0186	0.8769	0.8774	0.004	0.0003	19.2308	66.6667	13.9535	4.7619	20.6897	22.7273
	Bacteroides_rodentium:Bacteroides_uniformis-67	-0.0047	-0.0047	0.969	0.969	0	0	0	0	34.8837	35.7143	0	0
	Bacteroides_rodentium-66	-0.0311	-0.0311	0.7947	0.7947	0	0	3.84615	0	46.5116	35.7143	0	0
	Bacteroides_salyersiae-68	-0.0554	-0.0554	0.6439	0.6439	0	0	19.2308	20.5128	16.2791	26.1905	25.2874	24.2424
	Bacteroides_sp_1_1_6-69	-0.0741	-0.0741	0.5358	0.5358	0	0	0	5.12821	0	0	2.29885	7.57576
	Bacteroides_sp_2_1_22-70	-0.0302	-0.0302	0.8012	0.8012	0	0	0	7.69231	0	0	3.44828	3.0303
	Bacteroides_stercoris-71	-0.1615	-0.1555	0.1802	0.3138	0.354	0.0498	46.1538	97.4359	60.4651	42.8571	41.3793	57.5758
	Bacteroides_thetaiotaomicron-72	-0.2203	-0.2203	0.0669	0.0669	0	0	73.0769	100	4.65116	16.6667	71.2644	84.8485
	Bacteroides_uniformis:Bacteroides_xylanisolvens-74	-0.0855	-0.0855	0.4748	0.4748	0	0	0	0	23.2558	2.38095	0	0
	Bacteroides_uniformis-73	-0.2043	-0.2043	0.0883	0.0883	0	0	92.3077	100	95.3488	90.4762	87.3563	98.4848
	Bacteroides_vulgatus-75	-0.0859	-0.1054	0.4757	0.5283	0.447	0.0731	84.6154	100	93.0233	95.2381	80.4598	93.9394
	Bacteroides_xylanisolvens-76	-0.046	-0.0401	0.7022	0.7798	0.264	0.0324	80.7692	89.7436	74.4186	73.8095	60.9195	77.2727
	Barnesiella_intestinihominis-77	0.0699	0.071	0.5604	0.5594	0.021	0.0019	69.2308	82.0513	27.907	28.5714	58.6207	78.7879
	Bifidobacterium_adolescentis:Bifidobacterium_stercoris-79	0.0696	0.0696	0.5608	0.5608	0	0	46.1538	0	23.2558	35.7143	0	0
	Bifidobacterium_adolescentis-78	-0.1069	-0.1069	0.3724	0.3724	0	0	7.69231	74.359	0	0	27.5862	46.9697
	Bifidobacterium_animalis-80	0.072	0.072	0.5473	0.5473	0	0	15.3846	20.5128	0	0	6.89655	15.1515
	Bifidobacterium_bifidum-81	0.1337	0.1337	0.2652	0.2652	0	0	19.2308	35.8974	4.65116	19.0476	18.3908	15.1515
	Bifidobacterium_breve:Bifidobacterium_longum-83	0.0525	0.0525	0.6611	0.6611	0	0	0	0	32.5581	54.7619	0	0
	Bifidobacterium_breve-82	0.0338	0.0384	0.7783	0.7571	0.054	0.0051	11.5385	15.3846	0	4.7619	4.5977	4.54545
	Bifidobacterium_catenulatum:Bifidobacterium_kashiwanohense:Bifidobacterium_-85	-0.0054	-0.0054	0.9641	0.9641	0	0	42.3077	0	16.2791	21.4286	0	0
	Bifidobacterium_catenulatum-84	0.0131	0.0131	0.9131	0.9131	0	0	0	17.9487	0	0	5.74713	7.57576
	Bifidobacterium_dentium-86	-0.0746	-0.1038	0.5361	0.5414	0.464	0.0786	19.2308	33.3333	13.9535	19.0476	39.0805	27.2727
	Bifidobacterium_longum-87	0.0868	0.0868	0.469	0.469	0	0	69.2308	84.6154	0	4.7619	55.1724	72.7273
	Bifidobacterium_pseudocatenulatum-88	0.0546	0.0546	0.648	0.648	0	0	0	28.2051	0	0	13.7931	19.697
	Bilophila_unclassified-89	0.035	0.035	0.7697	0.7697	0	0	0	79.4872	0	0	72.4138	90.9091
	Bilophila_wadsworthia-90	-0.0735	-0.097	0.541	0.5092	0.296	0.0379	65.3846	79.4872	65.1163	66.6667	65.5172	78.7879
	Blautia_coccoides:Blautia_hansenii:Blautia_producta-91	-0.0613	-0.0613	0.6093	0.6093	0	0	46.1538	0	4.65116	7.14286	0	0
	Blautia_coccoides:Blautia_producta-92	-0.0086	-0.0086	0.9429	0.9429	0	0	15.3846	0	25.5814	21.4286	0	0
	Blautia_faecis:Blautia_glucerasea:Coprococcus_catus-95	-0.0548	-0.0548	0.6474	0.6474	0	0	19.2308	0	0	0	0	0
	Blautia_faecis:Blautia_glucerasea-94	-0.0716	-0.0716	0.5496	0.5496	0	0	38.4615	0	0	2.38095	0	0
	Blautia_faecis-93	-0.1524	-0.1524	0.204	0.204	0	0	88.4615	0	81.3953	83.3333	0	0
	Blautia_glucerasea:Blautia_luti:Blautia_schinkii-97	-0.0239	-0.0239	0.8417	0.8417	0	0	3.84615	0	0	0	0	0
	Blautia_glucerasea:Blautia_schinkii-98	0.0586	0.0586	0.6244	0.6244	0	0	42.3077	0	0	0	0	0
	Blautia_glucerasea-96	-0.0398	-0.0398	0.7392	0.7392	0	0	30.7692	0	44.186	73.8095	0	0
	Blautia_hansenii-99	-0.078	-0.078	0.5156	0.5156	0	0	15.3846	15.3846	67.4419	76.1905	1.14943	0
	Blautia_hydrogenotrophica-100	-0.0127	-0.0127	0.9156	0.9156	0	0	0	69.2308	0	0	10.3448	4.54545
	Blautia_luti:Blautia_wexlerae-102	-0.0324	-0.0324	0.7863	0.7863	0	0	96.1538	0	11.6279	19.0476	0	0
	Blautia_luti-101	0.0677	0.0677	0.5715	0.5715	0	0	84.6154	0	69.7674	85.7143	0	0
	Blautia_producta-103	-0.0992	-0.0992	0.4072	0.4072	0	0	0	76.9231	0	0	29.8851	6.06061
	Blautia_schinkii:Ruminococcus_lactaris-105	0.0602	0.0602	0.6147	0.6147	0	0	0	0	4.65116	19.0476	0	0
	Blautia_schinkii-104	-0.0034	-0.0034	0.9772	0.9772	0	0	42.3077	0	67.4419	83.3333	0	0
	Blautia_wexlerae-106	0.072	0.072	0.5472	0.5472	0	0	92.3077	0	90.6977	92.8571	0	0
	Burkholderiales_bacterium_1_1_47-107	-0.0616	-0.0616	0.6066	0.6066	0	0	0	51.2821	0	0	51.7241	51.5152
	Butyribacterium_methylotrophicum:Eubacterium_callanderi:Eubacterium_limosum-108	0.0349	0.0349	0.7703	0.7703	0	0	3.84615	0	2.32558	14.2857	0	0
	Butyricicoccus_pullicaecorum-109	0.0412	0.0388	0.7313	0.762	0.104	0.0104	3.84615	17.9487	18.6047	4.7619	14.9425	6.06061
	Butyricimonas_synergistica-110	0.0822	0.0822	0.492	0.492	0	0	0	10.2564	2.32558	0	19.5402	21.2121
	Butyricimonas_virosa-111	-0.095	-0.095	0.4274	0.4274	0	0	23.0769	0	23.2558	35.7143	0	0
	Butyrivibrio_crossotus-112	0.0418	0.0418	0.7268	0.7268	0	0	0	12.8205	0	0	5.74713	6.06061
	Butyrivibrio_unclassified-113	-0.0715	-0.0715	0.5508	0.5508	0	0	0	2.5641	0	0	5.74713	4.54545
	Campylobacter_concisus-114	0.0143	0.0143	0.905	0.905	0	0	0	0	4.65116	2.38095	2.29885	1.51515
	Campylobacter_gracilis-115	-0.1419	-0.1164	0.2391	0.472	0.41	0.0632	3.84615	2.5641	4.65116	4.7619	8.04598	1.51515
	candidate_division_TM7_single_cell_isolate_TM7c-411	-0.0651	-0.0651	0.5857	0.5857	0	0	0	7.69231	0	0	4.5977	1.51515
	Catenibacterium_mitsuokai-116	0.0539	0.0515	0.6532	0.6811	0.069	0.0067	0	15.3846	9.30233	9.52381	8.04598	10.6061
	Christensenella_minuta-117	-0.0139	-0.0139	0.9073	0.9073	0	0	7.69231	0	2.32558	16.6667	0	0
	Citrobacter_freundii-118	-0.0252	-0.0252	0.8332	0.8332	0	0	7.69231	10.2564	2.32558	4.7619	9.1954	6.06061
	Citrobacter_unclassified-119	0.0235	0.0235	0.8444	0.8444	0	0	0	7.69231	0	0	9.1954	9.09091
	Cloacibacillus_evryensis-120	0.0594	0.0594	0.6192	0.6192	0	0	0	0	2.32558	19.0476	0	0
	Clostridiaceae_bacterium_JC118-121	0.1072	0.0691	0.3733	0.6456	0.325	0.0435	0	58.9744	0	0	25.2874	34.8485
	Clostridiales_bacterium_1_7_47FAA-122	-0.0125	-0.0125	0.9166	0.9166	0	0	0	89.7436	0	0	62.069	57.5758
	Clostridium_aerotolerans:Clostridium_hathewayi:Clostridium_xylanolyticum-123	-0.0345	-0.0345	0.7729	0.7729	0	0	7.69231	0	0	0	0	0
	Clostridium_aerotolerans:Clostridium_xylanolyticum-124	0.0043	0.0043	0.9711	0.9711	0	0	73.0769	0	0	0	0	0
	Clostridium_aldenense:Clostridium_indolis-126	0.0293	0.0293	0.8063	0.8063	0	0	0	0	11.6279	35.7143	0	0
	Clostridium_aldenense-125	-0.0075	-0.0075	0.9501	0.9501	0	0	69.2308	0	46.5116	50	0	0
	Clostridium_asparagiforme:Clostridium_lavalense-128	-0.0354	-0.0354	0.7672	0.7672	0	0	3.84615	0	72.093	78.5714	0	0
	Clostridium_asparagiforme:Clostridium_symbiosum-129	0.0568	0.0568	0.6356	0.6356	0	0	23.0769	0	0	0	0	0
	Clostridium_asparagiforme-127	-0.0135	-0.0135	0.9104	0.9104	0	0	34.6154	92.3077	0	0	72.4138	75.7576
	Clostridium_bartlettii:Clostridium_irregulare-131	-0.0432	-0.0432	0.718	0.718	0	0	11.5385	0	0	0	0	0
	Clostridium_bartlettii-130	-0.0249	-0.0282	0.8359	0.8302	0.139	0.0145	57.6923	87.1795	39.5349	61.9048	57.4713	51.5152
	Clostridium_bolteae:Clostridium_citroniae:Clostridium_clostridioforme-133	-0.0969	-0.0969	0.4185	0.4185	0	0	15.3846	0	0	4.7619	0	0
	Clostridium_bolteae:Clostridium_clostridioforme-134	-0.0228	-0.0228	0.8487	0.8487	0	0	69.2308	0	90.6977	83.3333	0	0
	Clostridium_bolteae-132	-0.2297	-0.2297	0.056	0.056	0	0	0	100	0	0	88.5057	87.8788
	Clostridium_butyricum-135	0.056	0.0577	0.6408	0.6586	0.131	0.0136	3.84615	5.12821	2.32558	7.14286	0	0
	Clostridium_celatum-136	-0.0346	-0.0346	0.7728	0.7728	0	0	26.9231	2.5641	34.8837	35.7143	1.14943	4.54545
	Clostridium_chauvoei-137	-0.0527	-0.0527	0.6595	0.6595	0	0	0	0	11.6279	23.8095	0	0
	Clostridium_citroniae-138	-0.1788	-0.1788	0.1366	0.1366	0	0	19.2308	84.6154	46.5116	42.8571	64.3678	75.7576
	Clostridium_clostridioforme-139	-0.0782	-0.0782	0.5144	0.5144	0	0	0	94.8718	2.32558	0	51.7241	37.8788
	Clostridium_cocleatum-140	-0.017	-0.017	0.8869	0.8869	0	0	0	0	9.30233	14.2857	0	0
	Clostridium_difficile-141	0.0572	0.0572	0.6327	0.6327	0	0	0	0	11.6279	11.9048	1.14943	1.51515
	Clostridium_glycolicum-142	-0.1864	-0.1864	0.1204	0.1204	0	0	0	10.2564	16.2791	11.9048	1.14943	3.0303
	Clostridium_glycyrrhizinilyticum-143	-0.1153	-0.1153	0.3358	0.3358	0	0	65.3846	0	41.8605	45.2381	0	0
	Clostridium_hathewayi:Clostridium_sulfatireducens-145	0.0843	0.0843	0.4808	0.4808	0	0	0	0	39.5349	54.7619	0	0
	Clostridium_hathewayi:Clostridium_symbiosum-146	-0.0024	-0.0024	0.9838	0.9838	0	0	23.0769	0	0	0	0	0
	Clostridium_hathewayi-144	-0.2946	-0.2946	0.0144	0.0144	0	0	84.6154	100	86.0465	80.9524	81.6092	80.303
	Clostridium_hylemonae-147	-0.282	-0.282	0.0189	0.0189	0	0	30.7692	17.9487	60.4651	52.381	4.5977	3.0303
	Clostridium_indolis-148	0.0099	0.0099	0.9343	0.9343	0	0	0	0	39.5349	45.2381	0	0
	Clostridium_innocuum-149	-0.0732	-0.0732	0.5411	0.5411	0	0	0	74.359	0	0	14.9425	13.6364
	Clostridium_lactatifermentans-150	0.0431	0.0431	0.7191	0.7191	0	0	15.3846	0	37.2093	57.1429	0	0
	Clostridium_lavalense-151	0.0127	0.0127	0.9156	0.9156	0	0	34.6154	0	0	0	0	0
	Clostridium_leptum-152	-0.1255	-0.1255	0.2952	0.2952	0	0	0	100	0	0	73.5632	80.303
	Clostridium_methylpentosum-153	-0.2419	-0.2419	0.0443	0.0443	0	0	0	38.4615	20.9302	30.9524	8.04598	3.0303
	Clostridium_nexile-154	-0.0268	-0.0016	0.8237	0.992	0.364	0.0519	7.69231	56.4103	25.5814	16.6667	21.8391	19.697
	Clostridium_oroticum-155	0.0801	0.0801	0.5031	0.5031	0	0	69.2308	0	34.8837	50	0	0
	Clostridium_paraputrificum-156	-0.005	-0.005	0.9667	0.9667	0	0	3.84615	0	13.9535	11.9048	0	0
	Clostridium_perfringens:Clostridium_thermophilus-158	0.0071	0.0071	0.9529	0.9529	0	0	0	0	11.6279	11.9048	0	0
	Clostridium_perfringens-157	0.0462	0.0462	0.6999	0.6999	0	0	0	23.0769	4.65116	4.7619	6.89655	7.57576
	Clostridium_polysaccharolyticum-159	0.0431	0.0431	0.7186	0.7186	0	0	19.2308	0	0	0	0	0
	Clostridium_populeti:Ruminococcus_gauvreauii-161	-0.0493	-0.0493	0.6805	0.6805	0	0	15.3846	0	0	0	0	0
	Clostridium_populeti-160	0.0245	0.0245	0.8379	0.8379	0	0	61.5385	0	4.65116	0	0	0
	Clostridium_quinii-162	-0.0565	-0.0565	0.6366	0.6366	0	0	19.2308	0	0	2.38095	0	0
	Clostridium_ramosum-163	-0.0095	0.0225	0.9369	0.8871	0.389	0.0577	3.84615	74.359	44.186	66.6667	47.1264	15.1515
	Clostridium_ruminantium-164	0.0403	0.0403	0.7368	0.7368	0	0	30.7692	0	46.5116	61.9048	0	0
	Clostridium_saccharolyticum-165	-0.0323	-0.0323	0.787	0.787	0	0	65.3846	0	0	0	0	0
	Clostridium_scindens-166	0.055	0.055	0.6464	0.6464	0	0	26.9231	82.0513	34.8837	52.381	18.3908	18.1818
	Clostridium_sp_KLE_1755-167	0.0816	0.0717	0.4981	0.6547	0.403	0.0611	0	30.7692	0	0	3.44828	3.0303
	Clostridium_spiroforme-168	0.1075	0.1075	0.3694	0.3694	0	0	0	17.9487	30.2326	54.7619	0	0
	Clostridium_sulfatireducens-169	-0.0485	-0.0485	0.6849	0.6849	0	0	7.69231	0	60.4651	57.1429	0	0
	Clostridium_symbiosum-170	0.0418	0.0076	0.7289	0.9649	0.487	0.086	57.6923	84.6154	53.4884	50	52.8736	60.6061
	Collinsella_aerofaciens-171	0.0192	0.0267	0.8731	0.8434	0.181	0.0199	57.6923	100	37.2093	54.7619	47.1264	62.1212
	Collinsella_intestinalis-172	0.1014	0.1014	0.3976	0.3976	0	0	0	15.3846	0	0	3.44828	4.54545
	Collinsella_tanakaei-173	-0.0171	-0.0215	0.8869	0.8643	0.077	0.0075	7.69231	2.5641	2.32558	4.7619	4.5977	4.54545
	Collinsella_unclassified-174	-0.0806	-0.0806	0.5014	0.5014	0	0	0	2.5641	0	0	25.2874	15.1515
	Coprobacillus_cateniformis-175	-0.0235	-0.0235	0.8439	0.8439	0	0	0	0	9.30233	26.1905	0	0
	Coprobacillus_unclassified-176	0.0436	0.0436	0.715	0.715	0	0	0	79.4872	0	0	60.9195	34.8485
	Coprobacter_fastidiosus-177	-0.0228	-0.0265	0.8495	0.8351	0.095	0.0094	38.4615	28.2051	18.6047	23.8095	37.931	45.4545
	Coprococcus_catus-178	0.0165	0.0165	0.8903	0.8903	0	0	65.3846	79.4872	30.2326	26.1905	45.977	75.7576
	Coprococcus_comes-179	0.0312	-0.0767	0.7966	0.7128	0.641	0.1627	84.6154	92.3077	46.5116	59.5238	54.023	78.7879
	Coprococcus_eutactus-180	0.0903	0.0903	0.4512	0.4512	0	0	61.5385	2.5641	6.97674	7.14286	1.14943	4.54545
	Coprococcus_sp_ART55_1-181	0.1097	0.1097	0.3599	0.3599	0	0	0	10.2564	0	0	9.1954	28.7879
	Coriobacteriaceae_bacterium_phI-182	0.0481	0.0481	0.6876	0.6876	0	0	0	0	0	0	25.2874	15.1515
	Corynebacterium_durum-183	-0.0505	-0.0505	0.673	0.673	0	0	0	25.641	2.32558	7.14286	0	1.51515
	Deinococcus_unclassified-184	-0.0349	-0.0349	0.7703	0.7703	0	0	0	0	0	0	8.04598	9.09091
	Desulfovibrio_desulfuricans:Desulfovibrio_multispirans-186	0.0028	0.0028	0.9812	0.9812	0	0	0	0	16.2791	11.9048	0	0
	Desulfovibrio_desulfuricans-185	-0.0039	-0.0039	0.9742	0.9742	0	0	0	61.5385	0	0	50.5747	56.0606
	Desulfovibrio_fairfieldensis-187	0.0156	0.0156	0.8962	0.8962	0	0	3.84615	0	20.9302	11.9048	0	0
	Desulfovibrio_piger-188	0.0316	-0.0267	0.7938	0.8916	0.596	0.1343	11.5385	12.8205	0	2.38095	20.6897	21.2121
	Dialister_invisus-189	0.068	0.068	0.5704	0.5704	0	0	42.3077	79.4872	51.1628	30.9524	39.0805	27.2727
	Dialister_propionicifaciens-190	-0.0696	-0.0696	0.5608	0.5608	0	0	7.69231	0	11.6279	16.6667	0	0
	Dialister_succinatiphilus-191	0.0511	0.0511	0.6699	0.6699	0	0	0	0	9.30233	7.14286	5.74713	16.6667
	Dorea_formicigenerans-192	0.0676	0.0693	0.5736	0.6109	0.193	0.0216	76.9231	94.8718	37.2093	59.5238	59.7701	83.3333
	Dorea_longicatena-193	-0.1442	-0.1442	0.2284	0.2284	0	0	76.9231	100	65.1163	69.0476	62.069	86.3636
	Dorea_unclassified-194	-0.0265	-0.0265	0.8247	0.8247	0	0	0	15.3846	0	0	26.4368	15.1515
	Eggerthella_lenta-195	-0.1838	-0.1838	0.126	0.126	0	0	26.9231	94.8718	32.5581	54.7619	32.1839	18.1818
	Eggerthella_sp_1_3_56FAA-196	0.0824	0.0824	0.4907	0.4907	0	0	0	17.9487	0	0	1.14943	0
	Eggerthella_unclassified-197	-0.1778	-0.1778	0.1387	0.1387	0	0	0	97.4359	0	0	67.8161	50
	Enterobacter_asburiae:Enterobacter_ludwigii-198	0.075	0.075	0.5312	0.5312	0	0	0	0	16.2791	7.14286	0	0
	Enterobacter_cloacae:Salmonella_enterica-200	0.0263	0.0263	0.8261	0.8261	0	0	0	0	13.9535	26.1905	0	0
	Enterobacter_cloacae-199	0.0354	0.0849	0.7691	0.6179	0.466	0.0792	0	35.8974	6.97674	11.9048	14.9425	10.6061
	Enterobacter_ludwigii-201	0.1088	0.1088	0.3634	0.3634	0	0	7.69231	0	16.2791	2.38095	0	0
	Enterobacteriaceae_bacterium_9_2_54FAA-202	0.1371	0.1371	0.2521	0.2521	0	0	0	0	0	0	13.7931	13.6364
	Enterococcus_avium-203	-0.0486	-0.0486	0.6843	0.6843	0	0	0	12.8205	0	0	2.29885	1.51515
	Enterococcus_durans-204	0.0815	0.0815	0.4964	0.4964	0	0	0	17.9487	2.32558	2.38095	4.5977	9.09091
	Enterococcus_faecalis:Enterococcus_faecium-206	-0.0483	-0.0483	0.6862	0.6862	0	0	26.9231	0	0	0	0	0
	Enterococcus_faecalis-205	0.0439	0.0732	0.7151	0.6272	0.329	0.0442	0	20.5128	0	2.38095	22.9885	28.7879
	Enterococcus_faecium-207	0.0904	0.0904	0.4511	0.4511	0	0	0	7.69231	0	4.7619	13.7931	16.6667
	Erysipelotrichaceae_bacterium_2_2_44A-209	-0.1851	-0.1851	0.1227	0.1227	0	0	0	89.7436	0	0	39.0805	36.3636
	Erysipelotrichaceae_bacterium_21_3-208	-0.1132	-0.1132	0.3445	0.3445	0	0	0	92.3077	0	0	57.4713	31.8182
	Erysipelotrichaceae_bacterium_3_1_53-210	-0.1184	-0.1184	0.3229	0.3229	0	0	0	41.0256	0	0	5.74713	1.51515
	Erysipelotrichaceae_bacterium_5_2_54FAA-211	0.0734	0.0734	0.5402	0.5402	0	0	0	30.7692	0	0	13.7931	3.0303
	Erysipelotrichaceae_bacterium_6_1_45-212	-0.1041	-0.1041	0.3847	0.3847	0	0	0	94.8718	0	0	35.6322	24.2424
	Escherichia_coli:Escherichia_fergusonii:Shigella_flexneri-214	-0.03	-0.03	0.8018	0.8018	0	0	34.6154	0	0	0	0	0
	Escherichia_coli-213	0.1661	0.1607	0.1692	0.3783	0.53	0.1029	19.2308	94.8718	6.97674	33.3333	87.3563	81.8182
	Escherichia_fergusonii-215	0.0822	0.0822	0.4921	0.4921	0	0	0	0	16.2791	16.6667	0	0
	Escherichia_unclassified-216	0.0837	0.0837	0.4843	0.4843	0	0	0	53.8462	0	0	72.4138	74.2424
	Eubacterium_biforme-217	-0.0362	-0.0362	0.762	0.762	0	0	0	41.0256	0	0	17.2414	24.2424
	Eubacterium_coprostanoligenes-218	0.028	0.028	0.8151	0.8151	0	0	30.7692	0	6.97674	7.14286	0	0
	Eubacterium_cylindroides-219	0.0664	0.0664	0.5785	0.5785	0	0	0	2.5641	0	0	24.1379	16.6667
	Eubacterium_dolichum-220	-0.1038	-0.1038	0.3869	0.3869	0	0	0	35.8974	0	0	4.5977	7.57576
	Eubacterium_eligens-221	0.1834	0.1834	0.1261	0.1261	0	0	0	74.359	0	0	63.2184	83.3333
	Eubacterium_hallii-222	-0.0271	-0.0271	0.8205	0.8205	0	0	0	92.3077	0	0	64.3678	89.3939
	Eubacterium_limosum-223	-0.0454	-0.0427	0.7055	0.727	0.03	0.0028	3.84615	35.8974	0	0	14.9425	1.51515
	Eubacterium_ramulus-224	0.0584	0.0489	0.627	0.7075	0.129	0.0133	0	71.7949	0	0	35.6322	66.6667
	Eubacterium_rectale-225	-0.0385	-0.0385	0.7474	0.7474	0	0	0	100	0	0	63.2184	84.8485
	Eubacterium_siraeum-226	0.1323	0.1323	0.2688	0.2688	0	0	0	94.8718	0	0	51.7241	59.0909
	Eubacterium_sp_3_1_31-227	0.1382	0.1382	0.2485	0.2485	0	0	0	71.7949	0	0	14.9425	7.57576
	Eubacterium_ventriosum-228	0.043	0.043	0.7195	0.7195	0	0	0	51.2821	0	0	44.8276	71.2121
	Faecalibacterium_prausnitzii-229	0.131	0.2122	0.2782	0.2494	0.537	0.1063	96.1538	100	90.6977	97.619	82.7586	98.4848
	Finegoldia_magna-230	-0.0247	-0.0247	0.8369	0.8369	0	0	0	25.641	9.30233	2.38095	1.14943	0
	Flavonifractor_plautii-231	-0.1071	-0.1071	0.372	0.372	0	0	88.4615	92.3077	90.6977	92.8571	82.7586	66.6667
	Fusicatenibacter_saccharivorans-232	0.0339	0.0339	0.7767	0.7767	0	0	92.3077	0	79.0698	71.4286	0	0
	Fusobacterium_nucleatum:Fusobacterium_periodonticum-234	0.0558	0.0558	0.6408	0.6408	0	0	0	0	25.5814	19.0476	0	0
	Fusobacterium_nucleatum-233	-0.0472	-0.0498	0.6944	0.6894	0.059	0.0056	0	7.69231	4.65116	2.38095	6.89655	7.57576
	Fusobacterium_ulcerans-235	-0.0423	-0.0423	0.7244	0.7244	0	0	0	10.2564	4.65116	7.14286	1.14943	1.51515
	Gemella_haemolysans:Gemella_morbillorum:Gemella_sanguinis-236	0.0066	0.0066	0.9558	0.9558	0	0	0	0	11.6279	16.6667	0	0
	Gemella_sanguinis-237	-0.0254	-0.0254	0.8319	0.8319	0	0	3.84615	38.4615	0	0	2.29885	6.06061
	Gemella_unclassified-238	0.0614	0.0614	0.6079	0.6079	0	0	0	15.3846	0	0	4.5977	7.57576
	Gemmiger_formicilis:Subdoligranulum_variabile-240	0.1071	0.1071	0.3711	0.3711	0	0	0	0	9.30233	14.2857	0	0
	Gemmiger_formicilis-239	0.1671	0.1709	0.1645	0.1656	0.04	0.0037	80.7692	0	58.1395	57.1429	0	0
	Gordonibacter_pamelaeae-241	-0.0693	-0.0693	0.5624	0.5624	0	0	0	84.6154	11.6279	19.0476	32.1839	18.1818
	Granulicatella_adiacens:Granulicatella_paraadiacens-243	0.0558	0.0558	0.6412	0.6412	0	0	3.84615	0	9.30233	30.9524	0	0
	Granulicatella_adiacens-242	-0.2012	-0.2012	0.0936	0.0936	0	0	0	28.2051	0	0	6.89655	7.57576
	Granulicatella_unclassified-244	0.0555	0.0555	0.6426	0.6426	0	0	0	43.5897	0	0	24.1379	22.7273
	Granulicella_unclassified-245	-0.0404	-0.0404	0.735	0.735	0	0	0	0	0	0	5.74713	4.54545
	Haemophilus_parainfluenzae-246	-0.0265	-0.0195	0.826	0.9015	0.378	0.0551	19.2308	48.7179	60.4651	50	48.2759	53.0303
	Hafnia_alvei-247	-0.0089	-0.0117	0.9412	0.9243	0.035	0.0033	30.7692	0	2.32558	0	12.6437	13.6364
	Hespellia_porcina-248	0.0696	0.0696	0.5607	0.5607	0	0	30.7692	0	6.97674	0	0	0
	Holdemania_filiformis-249	-0.0685	-0.0685	0.5679	0.5679	0	0	7.69231	64.1026	60.4651	73.8095	48.2759	59.0909
	Holdemania_sp_AP2-250	-0.0879	-0.0879	0.4621	0.4621	0	0	0	10.2564	0	0	4.5977	4.54545
	Holdemania_unclassified-251	0.0328	0.0201	0.7845	0.879	0.15	0.0158	0	23.0769	0	0	41.3793	60.6061
	Howardella_ureilytica-252	0.1044	0.1044	0.383	0.383	0	0	11.5385	0	4.65116	4.7619	0	0
	Intestinimonas_butyriciproducens-253	0.0852	0.0863	0.4779	0.4867	0.052	0.0049	46.1538	0	46.5116	28.5714	0	0
	Klebsiella_oxytoca-254	-0.0676	-0.0676	0.5725	0.5725	0	0	0	10.2564	0	0	9.1954	9.09091
	Klebsiella_pneumoniae-255	-0.0248	-0.0248	0.8362	0.8362	0	0	3.84615	46.1538	9.30233	7.14286	6.89655	15.1515
	Klebsiella_unclassified-256	0.0015	0.0015	0.9897	0.9897	0	0	0	28.2051	0	0	11.4943	9.09091
	Lachnospiraceae_bacterium_1_4_56FAA-258	-0.047	-0.047	0.6949	0.6949	0	0	0	66.6667	0	0	20.6897	18.1818
	Lachnospiraceae_bacterium_2_1_58FAA-259	-0.0756	-0.0756	0.5269	0.5269	0	0	0	61.5385	0	0	45.977	33.3333
	Lachnospiraceae_bacterium_3_1_46FAA-260	0.0605	0.0605	0.6141	0.6141	0	0	0	97.4359	0	0	58.6207	77.2727
	Lachnospiraceae_bacterium_3_1_57FAA_CT1-261	-0.0821	-0.0821	0.4922	0.4922	0	0	0	84.6154	0	0	66.6667	62.1212
	Lachnospiraceae_bacterium_4_1_37FAA-262	-0.0619	-0.0619	0.6048	0.6048	0	0	0	33.3333	0	0	3.44828	3.0303
	Lachnospiraceae_bacterium_5_1_57FAA-263	0.0049	0.0049	0.9675	0.9675	0	0	0	79.4872	0	0	27.5862	10.6061
	Lachnospiraceae_bacterium_6_1_63FAA-265	0.0034	0.0034	0.9771	0.9771	0	0	0	25.641	0	0	3.44828	4.54545
	Lachnospiraceae_bacterium_8_1_57FAA-267	0.1287	0.1287	0.2833	0.2833	0	0	0	2.5641	0	0	22.9885	33.3333
	Lachnospiraceae_bacterium_9_1_43BFAA-268	0.0577	0.0577	0.63	0.63	0	0	0	53.8462	0	0	10.3448	4.54545
	Lactobacillus_animalis:Lactobacillus_apodemi:Lactobacillus_murinus-270	0.053	0.053	0.6576	0.6576	0	0	0	0	20.9302	30.9524	0	0
	Lactobacillus_animalis-269	-0.0403	-0.0403	0.7358	0.7358	0	0	0	33.3333	0	0	0	0
	Lactobacillus_casei_paracasei-271	-0.047	-0.047	0.6947	0.6947	0	0	0	35.8974	0	0	11.4943	6.06061
	Lactobacillus_delbrueckii-272	-0.0958	-0.0958	0.4244	0.4244	0	0	3.84615	5.12821	0	2.38095	6.89655	4.54545
	Lactobacillus_fermentum-273	-0.1331	-0.1331	0.2671	0.2671	0	0	7.69231	48.7179	13.9535	4.7619	13.7931	7.57576
	Lactobacillus_gasseri-274	-0.131	-0.131	0.2739	0.2739	0	0	0	35.8974	0	0	17.2414	13.6364
	Lactobacillus_mucosae-275	0.0106	0.0106	0.9293	0.9293	0	0	7.69231	2.5641	0	0	4.5977	1.51515
	Lactobacillus_plantarum-276	0.0389	0.0389	0.745	0.745	0	0	0	17.9487	0	0	5.74713	1.51515
	Lactobacillus_reuteri-277	0.0487	0.0487	0.6843	0.6843	0	0	0	12.8205	4.65116	2.38095	3.44828	3.0303
	Lactobacillus_rhamnosus-278	-0.0171	-0.0171	0.8863	0.8863	0	0	0	25.641	0	0	5.74713	0
	Lactobacillus_ruminis-279	0.168	0.168	0.1614	0.1614	0	0	3.84615	25.641	0	2.38095	0	6.06061
	Lactobacillus_sakei-280	0.1107	0.1107	0.3545	0.3545	0	0	0	5.12821	0	0	4.5977	1.51515
	Lactobacillus_salivarius-281	-0.1635	-0.1621	0.1741	0.2153	0.132	0.0137	3.84615	23.0769	2.32558	2.38095	6.89655	7.57576
	Lactobacillus_vaginalis-282	-0.0613	-0.0613	0.6088	0.6088	0	0	0	20.5128	0	2.38095	8.04598	3.0303
	Lactococcus_lactis-283	0.0006	0.0006	0.9961	0.9961	0	0	3.84615	74.359	18.6047	33.3333	29.8851	34.8485
	Lactonifactor_longoviformis-284	0.026	0.026	0.828	0.828	0	0	0	0	20.9302	23.8095	0	0
	Marvinbryantia_formatexigens-285	0.009	0.009	0.9404	0.9404	0	0	3.84615	10.2564	2.32558	2.38095	3.44828	0
	Megamonas_hypermegale-286	-0.1374	-0.1374	0.2513	0.2513	0	0	0	5.12821	0	0	6.89655	4.54545
	Megamonas_rupellensis-287	-0.1212	-0.1212	0.3114	0.3114	0	0	0	2.5641	0	0	6.89655	4.54545
	Megamonas_unclassified-288	-0.1689	-0.1689	0.1588	0.1588	0	0	0	30.7692	0	0	6.89655	6.06061
	Megasphaera_elsdenii:Megasphaera_hominis-290	-0.074	-0.0931	0.5387	0.5554	0.383	0.0562	3.84615	0	13.9535	2.38095	0	0
	Megasphaera_elsdenii-289	-0.0293	-0.0293	0.8064	0.8064	0	0	3.84615	0	0	0	3.44828	6.06061
	Megasphaera_micronuciformis-291	-0.2138	-0.2138	0.0751	0.0751	0	0	0	5.12821	2.32558	2.38095	10.3448	4.54545
	Megasphaera_unclassified-292	0.0294	0.0294	0.8059	0.8059	0	0	0	12.8205	0	0	20.6897	9.09091
	Methanobrevibacter_smithii-293	0.197	0.197	0.1004	0.1004	0	0	0	76.9231	16.2791	19.0476	36.7816	45.4545
	Methanobrevibacter_unclassified-294	-0.0137	-0.0137	0.9086	0.9086	0	0	0	20.5128	0	0	12.6437	15.1515
	Mitsuokella_multacida-295	-0.1175	-0.1175	0.3271	0.3271	0	0	3.84615	2.5641	2.32558	0	8.04598	10.6061
	Mitsuokella_unclassified-296	-0.0369	-0.0369	0.7573	0.7573	0	0	0	20.5128	0	0	20.6897	22.7273
	Morganella_morganii-297	-0.1648	-0.1648	0.1687	0.1687	0	0	0	0	6.97674	2.38095	1.14943	4.54545
	Odoribacter_laneus-298	-0.0389	-0.0425	0.7458	0.7497	0.159	0.0171	7.69231	5.12821	4.65116	2.38095	0	3.0303
	Odoribacter_splanchnicus-299	-0.0292	-0.0394	0.8082	0.7628	0.13	0.0135	69.2308	71.7949	55.814	61.9048	68.9655	84.8485
	Okadaella_gastrococcus:Streptococcus_parasanguinis-300	-0.0208	-0.0208	0.8615	0.8615	0	0	19.2308	0	0	0	0	0
	Olsenella_unclassified-301	-0.1166	-0.1166	0.33	0.33	0	0	0	7.69231	0	0	22.9885	18.1818
	Oribacterium_sinus-302	-0.2212	-0.2212	0.0653	0.0653	0	0	7.69231	2.5641	2.32558	4.7619	3.44828	3.0303
	Oscillibacter_sp_KLE_1728-303	0.001	0.001	0.9935	0.9935	0	0	0	25.641	0	0	0	0
	Oscillibacter_sp_KLE_1745-304	-0.0519	-0.0519	0.6654	0.6654	0	0	0	28.2051	0	0	4.5977	3.0303
	Oscillibacter_unclassified-305	-0.048	-0.048	0.6879	0.6879	0	0	0	84.6154	0	0	94.2529	100
	Oscillibacter_valericigenes-306	0.0015	0.0015	0.99	0.99	0	0	19.2308	0	4.65116	4.7619	0	0
	Oscillospira_guilliermondii-307	-0.023	-0.023	0.8476	0.8476	0	0	34.6154	0	6.97674	11.9048	0	0
	Oxalobacter_formigenes-308	0.2559	0.2559	0.0334	0.0334	0	0	11.5385	25.641	20.9302	9.52381	26.4368	40.9091
	Pantoea_unclassified-309	0.0701	0.0701	0.5581	0.5581	0	0	0	0	0	0	6.89655	7.57576
	Parabacteroides_distasonis-310	-0.0559	-0.0453	0.6417	0.7258	0.114	0.0116	92.3077	100	74.4186	78.5714	80.4598	83.3333
	Parabacteroides_goldsteinii-311	-0.1168	-0.1168	0.3305	0.3305	0	0	11.5385	56.4103	37.2093	28.5714	36.7816	31.8182
	Parabacteroides_gordonii-312	-0.0098	-0.0098	0.9347	0.9347	0	0	11.5385	0	13.9535	9.52381	0	0
	Parabacteroides_johnsonii-313	0.0184	0.0184	0.8779	0.8779	0	0	3.84615	51.2821	18.6047	21.4286	29.8851	42.4242
	Parabacteroides_merdae-314	0.1054	0.1358	0.3809	0.3476	0.273	0.0339	76.9231	100	51.1628	76.1905	67.8161	75.7576
	Paraprevotella_clara-316	-0.1655	-0.1655	0.1682	0.1682	0	0	30.7692	41.0256	20.9302	21.4286	27.5862	33.3333
	Paraprevotella_unclassified-317	-0.0805	-0.0805	0.5016	0.5016	0	0	0	69.2308	0	0	27.5862	37.8788
	Paraprevotella_xylaniphila-318	0.0823	0.0823	0.4932	0.4932	0	0	3.84615	28.2051	0	2.38095	27.5862	36.3636
	Parasporobacterium_paucivorans-319	0.0225	0.0225	0.8505	0.8505	0	0	23.0769	0	11.6279	21.4286	0	0
	Parasutterella_excrementihominis-320	-0.2518	-0.2518	0.0361	0.0361	0	0	50	53.8462	65.1163	64.2857	56.3218	53.0303
	Parvimonas_micra-321	-0.0444	-0.0431	0.712	0.7655	0.273	0.0339	3.84615	7.69231	6.97674	11.9048	0	0
	Parvimonas_unclassified-322	-0.094	-0.094	0.432	0.432	0	0	0	25.641	0	0	0	4.54545
	Peptoniphilus_lacrimalis-323	0.0361	0.0361	0.7628	0.7628	0	0	0	23.0769	6.97674	4.7619	0	0
	Peptostreptococcaceae_noname_unclassified-324	-0.0832	-0.0832	0.4877	0.4877	0	0	0	51.2821	0	0	36.7816	51.5152
	Peptostreptococcus_stomatis-325	-0.0647	-0.0696	0.5907	0.6319	0.281	0.0353	3.84615	2.5641	6.97674	2.38095	1.14943	4.54545
	Phascolarctobacterium_faecium-326	0.1147	0.1348	0.3401	0.3442	0.253	0.0306	30.7692	0	51.1628	57.1429	0	0
	Phascolarctobacterium_succinatutens-327	-0.0338	-0.0338	0.7776	0.7776	0	0	0	38.4615	2.32558	7.14286	19.5402	18.1818
	Porphyromonas_asaccharolytica-328	0.1453	0.1453	0.226	0.226	0	0	3.84615	25.641	4.65116	4.7619	2.29885	10.6061
	Porphyromonas_bennonis-329	-0.0026	0.0119	0.983	0.931	0.203	0.0229	0	7.69231	9.30233	2.38095	2.29885	3.0303
	Porphyromonas_uenonis-330	0.0439	0.0439	0.7144	0.7144	0	0	3.84615	5.12821	2.32558	0	1.14943	3.0303
	Prevotella_bivia-331	-0.1433	-0.1433	0.2325	0.2325	0	0	0	12.8205	0	0	4.5977	7.57576
	Prevotella_buccae-332	-0.1557	-0.1557	0.1947	0.1947	0	0	0	5.12821	2.32558	7.14286	4.5977	3.0303
	Prevotella_buccalis-333	0.1981	0.1981	0.0994	0.0994	0	0	0	7.69231	4.65116	7.14286	2.29885	3.0303
	Prevotella_copri-334	-0.0775	-0.1018	0.5197	0.5491	0.464	0.0785	34.6154	43.5897	27.907	11.9048	17.2414	28.7879
	Prevotella_disiens-335	-0.1237	-0.1237	0.3027	0.3027	0	0	0	2.5641	4.65116	4.7619	1.14943	10.6061
	Prevotella_stercorea-336	-0.115	-0.1142	0.3383	0.3484	0.022	0.002	11.5385	10.2564	4.65116	0	4.5977	3.0303
	Prevotella_timonensis-337	-0.0255	-0.0022	0.8319	0.9887	0.38	0.0554	3.84615	12.8205	6.97674	4.7619	0	6.06061
	Propionibacterium_freudenreichii-338	0.002	0.002	0.9867	0.9867	0	0	0	12.8205	0	0	6.89655	7.57576
	Proteus_mirabilis:Proteus_penneri:Proteus_vulgaris-339	-0.0564	-0.0564	0.6374	0.6374	0	0	7.69231	0	16.2791	4.7619	0	0
	Pseudobutyrivibrio_ruminis:Pseudobutyrivibrio_xylanivorans-340	-0.0197	-0.0197	0.8693	0.8693	0	0	65.3846	0	4.65116	11.9048	0	0
	Pseudoflavonifractor_capillosus-341	0.1119	0.0975	0.3521	0.475	0.195	0.0218	23.0769	76.9231	30.2326	33.3333	64.3678	54.5455
	Pyramidobacter_piscolens-342	0.065	0.065	0.587	0.587	0	0	7.69231	2.5641	0	4.7619	8.04598	3.0303
	Raoultella_ornithinolytica:Raoultella_planticola-343	-0.0361	-0.0361	0.7627	0.7627	0	0	7.69231	0	16.2791	2.38095	0	0
	Robinsoniella_peoriensis-344	-0.015	-0.015	0.9003	0.9003	0	0	7.69231	0	6.97674	11.9048	0	0
	Roseburia_faecis:Roseburia_hominis-346	-0.0231	-0.0231	0.8468	0.8468	0	0	46.1538	0	4.65116	4.7619	0	0
	Roseburia_faecis:Roseburia_intestinalis-347	0.0374	0.0374	0.7543	0.7543	0	0	15.3846	0	2.32558	0	0	0
	Roseburia_faecis-345	-0.0408	-0.0408	0.7329	0.7329	0	0	88.4615	0	86.0465	88.0952	0	0
	Roseburia_hominis-348	0.2421	0.2421	0.0439	0.0439	0	0	57.6923	84.6154	55.814	69.0476	64.3678	89.3939
	Roseburia_intestinalis:Roseburia_inulinivorans-350	0.002	0.002	0.9867	0.9867	0	0	19.2308	0	2.32558	0	0	0
	Roseburia_intestinalis-349	0.0218	0.0218	0.8555	0.8555	0	0	53.8462	100	74.4186	76.1905	75.8621	65.1515
	Roseburia_inulinivorans-351	-0.0609	-0.0611	0.6119	0.6114	0.004	0.0004	76.9231	92.3077	55.814	73.8095	68.9655	89.3939
	Roseburia_unclassified-352	0.1312	0.1312	0.2733	0.2733	0	0	0	25.641	0	0	27.5862	30.303
	Rothia_dentocariosa-353	0.0006	0.0006	0.996	0.996	0	0	0	35.8974	0	4.7619	4.5977	4.54545
	Rothia_mucilaginosa-354	-0.0721	-0.0721	0.5475	0.5475	0	0	0	58.9744	9.30233	9.52381	35.6322	31.8182
	Rothia_unclassified-355	-0.1095	-0.1095	0.3615	0.3615	0	0	0	15.3846	0	0	13.7931	4.54545
	Ruminococcaceae_bacterium_D16-356	0.0892	0.0892	0.4559	0.4559	0	0	0	92.3077	0	0	73.5632	69.697
	Ruminococcus_albus-357	0.0208	0.0208	0.8624	0.8624	0	0	7.69231	23.0769	2.32558	0	29.8851	34.8485
	Ruminococcus_bromii-358	0.154	0.154	0.1995	0.1995	0	0	84.6154	100	53.4884	52.381	70.1149	77.2727
	Ruminococcus_callidus-359	-0.1302	-0.1302	0.2772	0.2772	0	0	34.6154	25.641	16.2791	26.1905	33.3333	40.9091
	Ruminococcus_champanellensis:Ruminococcus_flavefaciens-361	-0.0596	-0.0596	0.6186	0.6186	0	0	0	0	6.97674	16.6667	0	0
	Ruminococcus_champanellensis-360	0.0939	0.0939	0.4333	0.4333	0	0	0	0	34.8837	42.8571	2.29885	1.51515
	Ruminococcus_flavefaciens-362	0.0551	0.0551	0.646	0.646	0	0	3.84615	0	2.32558	4.7619	6.89655	9.09091
	Ruminococcus_gauvreauii-363	0.0976	0.0976	0.4148	0.4148	0	0	69.2308	0	2.32558	2.38095	0	0
	Ruminococcus_gnavus-364	-0.0374	-0.0374	0.7544	0.7544	0	0	0	100	0	0	66.6667	43.9394
	Ruminococcus_lactaris-365	0.0182	0.0182	0.8789	0.8789	0	0	84.6154	84.6154	69.7674	90.4762	39.0805	46.9697
	Ruminococcus_obeum-366	0.0689	0.0689	0.565	0.565	0	0	0	100	0	0	90.8046	95.4545
	Ruminococcus_sp_5_1_39BFAA-367	-0.0003	-0.0003	0.9981	0.9981	0	0	0	89.7436	0	0	10.3448	18.1818
	Ruminococcus_torques-368	0.0013	-0.0125	0.9913	0.9263	0.181	0.0199	0	100	0	0	97.7011	100
	Scardovia_unclassified-369	-0.1746	-0.1746	0.1454	0.1454	0	0	0	5.12821	0	0	9.1954	6.06061
	Scardovia_wiggsiae-370	-0.2265	-0.2265	0.0597	0.0597	0	0	0	20.5128	2.32558	4.7619	18.3908	6.06061
	Shigella_boydii-371	0.0884	0.0884	0.4606	0.4606	0	0	0	0	9.30233	23.8095	0	0
	Shigella_dysenteriae-372	0.0858	0.0858	0.4739	0.4739	0	0	0	0	37.2093	26.1905	0	0
	Shigella_flexneri-373	0.1248	0.1248	0.2978	0.2978	0	0	3.84615	0	16.2791	33.3333	0	0
	Shigella_sonnei-374	0.0559	0.0662	0.6413	0.6092	0.117	0.012	0	0	6.97674	16.6667	1.14943	0
	Slackia_isoflavoniconvertens-375	-0.0525	-0.0525	0.661	0.661	0	0	11.5385	0	2.32558	4.7619	0	0
	Slackia_piriformis-376	0.0254	0.0254	0.832	0.832	0	0	3.84615	7.69231	2.32558	0	0	6.06061
	Solobacterium_moorei-377	-0.0694	-0.091	0.5644	0.5535	0.35	0.0487	0	46.1538	6.97674	4.7619	6.89655	9.09091
	Stomatobaculum_longum-378	-0.0226	-0.0217	0.8504	0.857	0.009	0.0008	42.3077	2.5641	0	0	4.5977	0
	Streptococcus_anginosus-379	-0.1046	-0.1164	0.3843	0.4131	0.251	0.0303	7.69231	48.7179	9.30233	19.0476	21.8391	18.1818
	Streptococcus_australis-380	0.0704	0.0704	0.5562	0.5562	0	0	0	41.0256	2.32558	0	21.8391	27.2727
	Streptococcus_constellatus-381	0.0185	0.0185	0.8772	0.8772	0	0	0	17.9487	0	0	1.14943	3.0303
	Streptococcus_cristatus-382	-0.0851	-0.0851	0.477	0.477	0	0	0	15.3846	0	2.38095	0	1.51515
	Streptococcus_gordonii-383	-0.0811	-0.0811	0.4979	0.4979	0	0	3.84615	41.0256	4.65116	16.6667	18.3908	15.1515
	Streptococcus_infantis-384	-0.1057	-0.1057	0.3779	0.3779	0	0	0	28.2051	0	0	14.9425	13.6364
	Streptococcus_intermedius-385	0.0372	0.0372	0.7561	0.7561	0	0	0	28.2051	0	2.38095	1.14943	3.0303
	Streptococcus_mitis_oralis_pneumoniae-386	-0.155	-0.155	0.1955	0.1955	0	0	0	48.7179	0	0	31.0345	28.7879
	Streptococcus_mutans-387	0.0391	0.0391	0.7442	0.7442	0	0	0	43.5897	2.32558	30.9524	8.04598	4.54545
	Streptococcus_parasanguinis-388	-0.0636	-0.0636	0.5948	0.5948	0	0	0	89.7436	2.32558	0	70.1149	51.5152
	Streptococcus_salivarius:Streptococcus_thermophilus:Streptococcus_vestibula-391	-0.0047	-0.0047	0.9686	0.9686	0	0	34.6154	0	65.1163	88.0952	0	0
	Streptococcus_salivarius:Streptococcus_thermophilus-390	-0.0098	-0.0098	0.9346	0.9346	0	0	38.4615	0	0	0	0	0
	Streptococcus_salivarius:Streptococcus_vestibularis-392	-0.0224	-0.0224	0.8515	0.8515	0	0	34.6154	0	0	0	0	0
	Streptococcus_salivarius-389	-0.094	-0.094	0.4325	0.4325	0	0	0	100	0	7.14286	77.0115	71.2121
	Streptococcus_sanguinis-393	-0.1076	-0.1076	0.3688	0.3688	0	0	0	53.8462	2.32558	11.9048	14.9425	9.09091
	Streptococcus_thermophilus-394	-0.1311	-0.1311	0.2749	0.2749	0	0	7.69231	89.7436	4.65116	9.52381	63.2184	69.697
	Streptococcus_tigurinus-395	-0.0318	-0.0318	0.7905	0.7905	0	0	0	15.3846	0	0	1.14943	0
	Streptococcus_vestibularis-396	0.0207	0.0009	0.863	0.9951	0.242	0.0289	0	61.5385	0	0	18.3908	13.6364
	Subdoligranulum_sp_4_3_54A2FAA-397	-0.1248	-0.1248	0.2979	0.2979	0	0	0	76.9231	0	0	19.5402	19.697
	Subdoligranulum_unclassified-398	0.1152	0.1152	0.3367	0.3367	0	0	0	100	0	0	98.8506	100
	Subdoligranulum_variabile-399	0.0674	0.0674	0.5742	0.5742	0	0	7.69231	46.1538	25.5814	21.4286	21.8391	16.6667
	Sutterella_stercoricanis-400	0.0465	0.0465	0.6978	0.6978	0	0	7.69231	0	11.6279	16.6667	0	0
	Sutterella_wadsworthensis-401	-0.0247	-0.0247	0.8364	0.8364	0	0	46.1538	41.0256	16.2791	16.6667	26.4368	34.8485
	Turicibacter_sanguinis-402	0.0033	0.0033	0.9778	0.9778	0	0	15.3846	20.5128	27.907	45.2381	5.74713	0
	Turicibacter_unclassified-403	-0.0955	-0.0955	0.4247	0.4247	0	0	0	20.5128	0	0	14.9425	3.0303
	Veillonella_atypica:Veillonella_dispar-405	0.0321	0.0321	0.788	0.788	0	0	0	0	30.2326	54.7619	0	0
	Veillonella_atypica:Veillonella_parvula-406	0.0142	0.0142	0.9056	0.9056	0	0	0	0	11.6279	14.2857	0	0
	Veillonella_atypica-404	-0.0213	-0.0213	0.8588	0.8588	0	0	0	35.8974	0	0	36.7816	34.8485
	Veillonella_dispar-407	0.1312	0.1312	0.2744	0.2744	0	0	0	33.3333	20.9302	30.9524	31.0345	19.697
	Veillonella_parvula:Veillonella_rogosae:Veillonella_tobetsuensis-409	0.0024	0.0024	0.9841	0.9841	0	0	0	0	30.2326	28.5714	0	0
	Veillonella_parvula-408	-0.3254	-0.3254	0.0069	0.0069	0	0	3.84615	56.4103	6.97674	4.7619	62.069	62.1212
	Veillonella_unclassified-410	-0.0537	-0.0537	0.6536	0.6536	0	0	0	79.4872	0	0	71.2644	75.7576
