# Supplementary material for: A Uniform Computational Approach Improved on Existing Pipelines to Reveal Microbiome Biomarkers of Nonresponse to Immune Checkpoint Inhibitors
Source: Oxford University Press journal article supplement (doi:10.1158/1078-0432.ccr-20-4834), 2021-02-16
Supplement: 10780432ccr204834-sup-257224_2_supp_6901644_q12p1x.xls [file 10780432ccr204834-sup-257224_2_supp_6901644_q12p1x.xls]

## Sheet: Table S5
	Alpha Diversity Statistic	Clinical Response	Antibiotic Exposure	Group Sizes	Mean	SEM	T test	Mann Whitney
	Chao1	All	+	32	73.5	4.1	0.296	0.765
		All	-	121	78.1	1.6
	Observed species	All	+	32	68.8	3.7	0.381	0.779
		All	-	121	72.2	1.3
	Shannon	All	+	32	4	0.2	0.142	0.066
		All	-	121	4.2	0
	Simpson reciprocal	All	+	32	10.9	1	0.413	0.182
		All	-	121	11.8	0.4
	Chao1	R	+	14	75.9	6.8	0.691	0.669
		R	-	72	78.7	1.6
	Observed species	R	+	14	71.5	6.4	0.769	0.615
		R	-	72	73.5	1.5
	Shannon	R	+	14	3.9	0.3	0.43	0.57
		R	-	72	4.2	0.1
	Simpson reciprocal	R	+	14	11.6	1.8	0.937	0.669
		R	-	72	11.8	0.5
	Chao1	NR	+	18	71.7	5	0.353	0.596
		NR	-	49	77.2	3.1
	Observed species	NR	+	18	66.7	4.4	0.453	0.635
		NR	-	49	70.4	2.4
	Shannon	NR	+	18	4	0.1	0.127	0.115
		NR	-	49	4.2	0.1
	Simpson reciprocal	NR	+	18	10.4	1	0.233	0.295
		NR	-	49	11.8	0.7
	Chao1	R	+	14	75.9	6.8	0.622	0.442
		NR	+	18	71.7	5
	Observed species	R	+	14	71.5	6.4	0.539	0.352
		NR	+	18	66.7	4.4
	Shannon	R	+	14	3.9	0.3	0.912	0.488
		NR	+	18	4	0.1
	Simpson reciprocal	R	+	14	11.6	1.8	0.564	0.779
		NR	+	18	10.4	1
	Chao1	R	-	72	78.7	1.6	0.67	0.241
		NR	-	49	77.2	3.1
	Observed species	R	-	72	73.5	1.5	0.285	0.131
		NR	-	49	70.4	2.4
	Shannon	R	-	72	4.2	0.1	0.874	0.629
		NR	-	49	4.2	0.1
	Simpson reciprocal	R	-	72	11.8	0.5	0.945	0.905
		NR	-	49	11.8	0.7
